# Supplementary material for: Mismatch Amplification Mutation Assay-Based Real-Time PCR for Rapid Detection of Neisseria gonorrhoeae and Antimicrobial Resistance Determinants in Clinical Specimens
Source: PubMed Central journal article supplement (PMC6113480; doi:10.1128/jcm.00365-18), 2018-08-27
Supplement: zjm999096088s1.pdf [file zjm999096088s1.pdf]

**Table S1.** Samples included in the study

| <b>Samples</b>                               | <b>urethra</b> | <b>rectum</b> | <b>pharynx</b> | <b>cervix</b> | <b>vagina</b> | <b>total</b> |
|----------------------------------------------|----------------|---------------|----------------|---------------|---------------|--------------|
| NAAT result available                        | 259            | 259           | 261            | 19            | 21            | 819          |
| RT-PCR results available                     | 177            | 130           | 158            | 11            | 13            | 489          |
| Paired culture isolates                      | 57             | 58            | 35             | 5             | 4             | 159          |
| RT-PCR and paired culture isolates available | 35             | 31            | 23             | 3             | 2             | 94           |

**Table S2.** Real-time PCR results for the 45 *Neisseria gonorrhoeae* (NG) control isolates

| NG control isolates | <i>opa</i><br>Ct±SD <sup>a</sup> | <i>penA</i> Asp345del<br>Ct±SD <sup>a</sup> | <i>penA</i> Gly545Ser<br>Ct±SD <sup>a</sup> | 23S rRNA A2059G<br>Ct±SD <sup>a</sup> | 23S rRNA C2611T<br>Ct±SD <sup>a</sup> | <i>gyrA</i> Ser91Phe<br>Ct±SD <sup>a</sup> | 16S rRNA C1192T<br>Ct±SD <sup>a</sup> |
|---------------------|----------------------------------|---------------------------------------------|---------------------------------------------|---------------------------------------|---------------------------------------|--------------------------------------------|---------------------------------------|
| 2131245             | 15.14±0.06                       | 36.81±NA                                    | 38.83±NA                                    | 28.21±0.08                            | 25.75±0.03                            | 18.69±0.13                                 | 35.97±0.53                            |
| 2132307             | 19.71±1.67                       | 18.91±0.81                                  | 20.01±0.73                                  | 29.06±0.97                            | 27.31±1.24                            | 21.5±0.17                                  | 39.01±0.88                            |
| 2112655             | 19.09±0.56                       | 19.76±0.13                                  | 20.85±0.38                                  | 31.59±0.38                            | 29.38±0.11                            | 22.24±0.19                                 | 38.76±0.33                            |
| 2086772             | 18.74±0.06                       | 33.83±0.49                                  | 34.39±0.5                                   | 31.35±0.03                            | 29.03±0.06                            | 21.98±0                                    | 38.29±0.32                            |
| 1946253             | 19.66±0.11                       | 19.45±0.11                                  | 20.26±0.01                                  | 30.69±0.23                            | 28.23±0.02                            | 21.11±0.05                                 | 37.55±0.01                            |
| 1954615             | 17.19±0.03                       | 34.2±0.44                                   | 35.76±0.68                                  | 28.88±0.03                            | 26.69±0.02                            | 19.53±0.14                                 | 37.36±0.69                            |
| 2129562             | 20.69±0.01                       | >40±NA                                      | >40±NA                                      | 32.18±0.09                            | 29.48±0.05                            | 22.36±0.15                                 | 39.791±NA                             |
| 2121127             | 20.48±0.01                       | >40±NA                                      | >40±NA                                      | 33.42±0.12                            | 30.89±0.01                            | 24.35±0.07                                 | >40±NA                                |
| 1944251             | 18.35±0.07                       | 38.21±NA                                    | >40±NA                                      | 31.28±0.03                            | 29.01±0.05                            | 33.53±0.13                                 | 38.81±0.11                            |
| 2036196             | 18.7±0.08                        | >40±NA                                      | >40±NA                                      | 31.74±0.01                            | 29.31±0.11                            | 22.29±0.04                                 | 38.58±0.17                            |
| 2119347             | 19.12±0.59                       | 18.59±0.23                                  | 19.44±0.06                                  | 29.48±0.04                            | 26.85±0.03                            | 20.13±0.13                                 | 36.19±0.03                            |
| 2096513             | 15.32±0.11                       | 36.199±1.05                                 | 37±NA                                       | 28.73±0.11                            | 25.92±0.05                            | 30.25±0.03                                 | 35.41±0.1                             |
| 1929711             | 16.28±0.15                       | >40±NA                                      | 37.68±0.69                                  | 29.37±0.07                            | 26.6±0.03                             | 30.83±0.05                                 | 35.73±0.38                            |
| 1865296             | 16.99±0.05                       | 37.17±NA                                    | >40±NA                                      | 27.72±0.01                            | 25.16±0.02                            | 18.04±0.03                                 | 34.25±0.44                            |
| 1820606             | 15.7±0.18                        | >40±NA                                      | 36.37±NA                                    | 28.47±0.1                             | 25.94±0.08                            | 30.33±0.12                                 | 35.16±0.02                            |
| 1922603             | 18.28±0.1                        | 18.57±0.05                                  | 19.6±0.1                                    | 29.88±0.13                            | 27.66±0.05                            | 20.57±0.06                                 | 38.55±0.58                            |
| 1912168             | 14.82±0.06                       | 31.71±0.28                                  | 32.77±0.26                                  | 27.71±0.13                            | 25.29±0.01                            | 18.07±0.01                                 | 36.51±0.34                            |
| 2017570             | 12.11±2.25                       | 14.13±0.14                                  | 15.28±0.18                                  | 25.06±1.43                            | 23.44±0.56                            | 15.37±1.04                                 | 33.17±1.28                            |
| 1996003             | 17.46±0.05                       | >40±NA                                      | >40±NA                                      | 29.48±0.01                            | 27.38±0.02                            | 20.11±0.07                                 | 37.1±0.15                             |
| 2004277             | 17.93±0.89                       | >40±NA                                      | >40±NA                                      | 30.58±0.84                            | 28.21±0.81                            | 33.65±0.17                                 | 39.28±0.34                            |
| 1973517             | 16.2±0.04                        | 35.95±NA                                    | 39.3±0.58                                   | 30.72±0.13                            | 28.14±0.33                            | 33.13±0.04                                 | 39.5±NA                               |
| 1832086             | 18.92±0.01                       | 18.06±0.3                                   | 19.16±0.1                                   | 29.61±0.01                            | 27.34±0.01                            | 20.2±0.09                                  | 37.15±0.26                            |
| 1872778             | 16.43±0.06                       | 37.26±1.3                                   | 37.27±0.81                                  | 28.46±0.09                            | 25.94±0.24                            | 18.69±0.3                                  | 35.8±0.03                             |

|           |            |            |            |            |            |            |             |
|-----------|------------|------------|------------|------------|------------|------------|-------------|
| 1910312   | 14.92±0.03 | 36.56±0.46 | 37.66±NA   | 27.89±0.07 | 25.55±0.04 | 29.99±0.1  | 35.03±0.18  |
| 1859198   | 17.31±0.07 | 33.72±0.67 | 35.33±1.43 | 28.93±0.04 | 26.69±0.02 | 19.57±0.06 | 35.77±0.36  |
| 1869994   | 16.84±0.03 | 35.52±0.04 | 36.14±0.48 | 29.71±0.08 | 27.37±0.03 | 20.46±0.06 | 36.73±0.11  |
| WHO A     | 16.8±0.27  | >40±NA     | 37.92±NA   | 30.02±0.03 | 27.72±0.06 | 32.38±0.03 | 39.65±NA    |
| WHO O     | 17.1±0.27  | 37±NA      | >40±NA     | 31.28±0.05 | 29±0.05    | 33.7±0.28  | 26.448±0.18 |
| WHO L     | 16.15±0.02 | 37.07±NA   | 37.66±NA   | 30.37±0.11 | 27.97±0    | 20.52±0.03 | 39.48±0.68  |
| WHO K     | 14.16±2.16 | 16.8±1.22  | 36.25±0.26 | 29.36±0.15 | 27±0.22    | 19.94±0.33 | 38.28±0.24  |
| G07       | 14.86±0.13 | 35.11±0.37 | 36.8±NA    | 26.46±0.01 | 13.04±0.12 | 16.77±0.13 | 34.02±0.51  |
| WHO V     | 17.37±0.1  | 36.85±NA   | 38.67±NA   | 18.1±0.02  | 27.48±0.02 | 20.49±0.02 | 37.38±0.01  |
| WHO Y     | 17.97±0.07 | 17.61±0.12 | 18.18±0.07 | 28.77±0.07 | 26.31±0.01 | 19.17±0.09 | 35.47±0.05  |
| ATCC49226 | 16.3±0.02  | 36.98±NA   | 37.16±NA   | 28.62±0.01 | 26.25±0.02 | 30.22±0.04 | 35.49±0.28  |
| WHO P     | 14.37±0.13 | 37.22±0.11 | 37.49±1.83 | 27.33±0.12 | 24.86±0.01 | 29.15±0.06 | 34.14±0.06  |
| WHO Z     | 13.97±0.01 | 35.77±0.02 | >40±NA     | 26.48±0.02 | 23.62±0.02 | 17.05±0.08 | 33.61±0.4   |
| WHO U     | 13.41±2.63 | 37.08±NA   | 38.09±NA   | 26.83±0.6  | 13.29±1.28 | 29.03±0.34 | 33.87±0.4   |
| GC3       | 13.52±0.84 | 37.85±NA   | >40±NA     | 26.72±0.73 | 24.28±0.47 | 28.91±0.21 | 20.18±0.09  |
| GC4       | 12.33±0.08 | 37.58±0.84 | 38.13±NA   | 13.09±0.04 | 22.5±0.01  | 26.99±0.05 | 31.67±0.31  |
| WHO F     | 11.8±0.01  | >40±NA     | >40±NA     | 24.84±0.04 | 22.63±0.17 | 27.2±0.03  | 31.81±0.52  |
| WHO G     | 12.24±0.05 | >40±NA     | >40±NA     | 25.3±0.1   | 22.46±0.01 | 15.64±0.12 | 31.7±0.34   |
| WHO M     | 11.33±0.13 | >40±NA     | >40±NA     | 24.34±0.22 | 23.25±0.23 | 16.11±0.1  | 31.98±0.52  |
| WHO N     | 12.57±0.03 | >40±NA     | >40±NA     | 25.18±0.12 | 22.32±0.05 | 15.68±0.1  | 31.24±0.08  |
| WHO W     | 12.13±0.11 | 13.87±0.03 | 31.47±0.01 | 25.34±0.06 | 22.6±0.08  | 15.75±0.14 | 31.09±0.35  |
| WHO X     | 11.96±2.9  | 21.61±0.78 | >40±NA     | 25.26±1.89 | 22.21±0.41 | 15.95±0.34 | 31.17±0.27  |

**Note.** Ct, cycle threshold; SD, standard deviation; NA, not applicable

<sup>a</sup> Average cycle threshold and standard deviation of duplicates are shown; if only one duplicate had a Ct below 40, the Ct of the duplicate with Ct<40 is shown

**Table S3.** Performance of the real-time PCR in the prediction of antimicrobial resistance in *Neisseria gonorrhoeae* (NG) control isolates

| Reaction                                           | Associated antibiotic | TP | FP | FN | TN | Total | Sensitivity (95% CI) <sup>a</sup> | Specificity (95% CI) <sup>a</sup> |
|----------------------------------------------------|-----------------------|----|----|----|----|-------|-----------------------------------|-----------------------------------|
| <i>penA</i> Asp345del +/-<br><i>penA</i> Gly545Ser | ESCs                  | 5  | 5  | 3  | 32 | 45    | 0.62 (0.24, 0.91)                 | 0.86 (0.71, 0.95)                 |
| 23S rRNA C2611T and/or<br>23S rRNA A2059G          | AZM                   | 4  | 0  | 0  | 41 | 45    | 1.00 (0.40, 1.00)                 | 1.00 (0.91, 1.00)                 |
| <i>gyrA</i> Ser91Phe                               | CIP                   | 30 | 0  | 0  | 15 | 45    | 1.00 (0.88, 1.00)                 | 1.00 (0.78, 1.00)                 |
| 16S rRNA C1192T                                    | SPC                   | 2  | 0  | 1  | 42 | 45    | 0.67 (0.09, 0.99)                 | 1.00 (0.92, 1.00)                 |

**Note.** CI, confidence interval; TP, true positive; FP, false positive; FN, false negative; TN, true negative; ESCs, extended-spectrum cephalosporins; AZM, azithromycin; CIP, ciprofloxacin; SPC, spectinomycin

<sup>a</sup> Sensitivity and specificity were calculated based on the phenotype (MICs) of the NG control isolates

**Table S4.** Real-time PCR results for the non-gonococcal control isolates

| <b>Non-gonoccal isolates</b>     | <i>opa</i><br>Ct±SD <sup>a</sup> | <i>penA</i> Asp345del<br>Ct±SD <sup>a</sup> | <i>penA</i> Gly545Ser<br>Ct±SD <sup>a</sup> | 23S rRNA A2059G<br>Ct±SD <sup>a</sup> | 23S rRNA C2611T<br>Ct±SD <sup>a</sup> | <i>gyrA</i> Ser91Phe<br>Ct±SD <sup>a</sup> | 16S rRNA C1192T<br>Ct±SD <sup>a</sup> |
|----------------------------------|----------------------------------|---------------------------------------------|---------------------------------------------|---------------------------------------|---------------------------------------|--------------------------------------------|---------------------------------------|
| <i>N. sicca</i> (3319)           | >40±NA                           | 30.62±0.03                                  | >40±NA                                      | 33.19±0.01                            | 31.08±0.21                            | >40±NA                                     | >40±NA                                |
| <i>N. mucosa</i> (130/93)        | 31.75±0.09                       | 31.46±0.02                                  | >40±NA                                      | 30.49±0.1                             | 28.29±0.06                            | >40±NA                                     | >40±NA                                |
| <i>N. sicca</i> (3754)           | 37.41±0.88                       | 31.03±0.26                                  | >40±NA                                      | 31.79±1.07                            | 29.81±0.71                            | >40±NA                                     | >40±NA                                |
| <i>N. sicca</i> (PS-7)           | 35.02±0.33                       | 28.52±0                                     | 36.732±NA                                   | 26.94±0.24                            | 23.91±0.16                            | >40±NA                                     | >40±NA                                |
| <i>N. flavescens</i> (4754)      | >40±NA                           | >40±NA                                      | >40±NA                                      | 35.32±0.41                            | 30.55±0.01                            | >40±NA                                     | >40±NA                                |
| <i>N. flava</i> (10d)            | >40±NA                           | 19.05±0.12                                  | >40±NA                                      | 34.65±0.21                            | >40±NA                                | >40±NA                                     | >40±NA                                |
| <i>N. subflava</i> (112-94)      | >40±NA                           | 19.9±0.07                                   | >40±NA                                      | 34.75±0.32                            | 29.21±0.04                            | >40±NA                                     | >40±NA                                |
| <i>N. flavescens</i> (423)       | >40±NA                           | 18.81±0                                     | >40±NA                                      | 29.98±0.19                            | 27.71±0.01                            | >40±NA                                     | >40±NA                                |
| <i>N. subflava</i> (82-94)       | >40±NA                           | 21.29±0.26                                  | 35.82±NA                                    | 36.46±0.04                            | 30.62±0.15                            | >40±NA                                     | >40±NA                                |
| <i>N. polysacchara</i> (N462)    | 33.5±1.64                        | 31.58±1.22                                  | >40±NA                                      | 38.55±0.5                             | 32.95±0.15                            | >40±NA                                     | >40±NA                                |
| <i>N. flavescens</i> (107)       | >40±NA                           | 33.36±0.82                                  | >40±NA                                      | 35.13±0.9                             | 32.3±0.01                             | >40±NA                                     | >40±NA                                |
| <i>N. lactamica</i> (RS-46)      | >40±NA                           | 32.74±0.39                                  | >40±NA                                      | 29.29±0.44                            | 34.79±0.41                            | 37.2±NA                                    | >40±NA                                |
| <i>N. cinerea</i> (58/95)        | >40±NA                           | 37.86±0.26                                  | >40±NA                                      | 39.38±NA                              | 33±0.1                                | >40±NA                                     | >40±NA                                |
| <i>N. cinerea</i> (145/96)       | >40±NA                           | >40±NA                                      | >40±NA                                      | 34.62±0.01                            | 32.76±0.07                            | >40±NA                                     | >40±NA                                |
| <i>N. mucosa</i> (179/98)        | >40±NA                           | >40±NA                                      | 37.4±NA                                     | 33±0.55                               | 29.69±1.46                            | >40±NA                                     | >40±NA                                |
| <i>N. meningitidis</i> (5408.62) | 37.6±1.25                        | >40±NA                                      | >40±NA                                      | 31.36±0.07                            | 34.11±0.2                             | 31.27±0.12                                 | >40±NA                                |
| <i>N. meningitidis</i> (5507.19) | 34.12±0.13                       | >40±NA                                      | >40±NA                                      | 29.53±0.18                            | 23.94±0.01                            | 29.9±0.04                                  | >40±NA                                |
| <i>N. meningitidis</i> (4904.61) | 34.16±0.8                        | 38.36±NA                                    | >40±NA                                      | 29.52±0                               | 23.96±0.12                            | 29.73±0.04                                 | >40±NA                                |
| <i>N. weaveri</i> (3803.40)      | 30.32±2.16                       | 34.27±0.06                                  | >40±NA                                      | 25.74±0.1                             | 36.4±0.05                             | 35.2±0.42                                  | >40±NA                                |
| <i>N. bacilliformis</i> (A16.28) | 34.91±0.09                       | 39.36±0.25                                  | >40±NA                                      | 26.77±0.03                            | 34.52±1.45                            | 36.91±0.11                                 | 32.72±0.05                            |

**Note.** Ct, cycle threshold; SD, standard deviation; NA, not applicable

<sup>a</sup> Average cycle threshold and standard deviation of duplicates are shown; if only one duplicate had a Ct below 40, the Ct of the duplicate with Ct<40 is shown

**Table S5.** MIC results for the paired culture isolates

| Isolate number | MIC (mg/L)  |          |               |               |              |
|----------------|-------------|----------|---------------|---------------|--------------|
|                | Ceftriaxone | Cefixime | Ciprofloxacin | Spectinomycin | Azithromycin |
| 1              | <0.002      | <0.016   | 0.003         | 12            | 0.38         |
| 2              | 0.016       | 0.023    | 6             | 12            | 0.38         |
| 3              | 0.003       | <0.016   | 0.003         | 12            | 0.125        |
| 4              | <0.002      | <0.016   | 0.003         | 8             | 0.38         |
| 5              | <0.002      | <0.016   | 0.002         | 8             | 0.25         |
| 6              | <0.002      | <0.016   | 0.002         | 8             | 0.094        |
| 7              | 0.002       | <0.016   | 1.5           | 12            | 0.19         |
| 8              | 0.003       | <0.016   | 1.5           | 12            | 0.19         |
| 9              | 0.003       | <0.016   | 0.003         | 12            | 0.19         |
| 10             | <0.002      | <0.016   | 0.003         | 8             | 0.38         |
| 11             | 0.003       | <0.016   | 0.003         | 6             | 0.38         |
| 12             | 0.016       | 0.032    | 16            | 6             | 0.25         |
| 13             | <0.002      | <0.016   | 0.002         | 6             | 0.19         |
| 14             | 0.023       | <0.016   | >32           | 4             | 0.25         |
| 15             | 0.023       | <0.016   | 0.006         | 16            | 0.75         |
| 16             | <0.002      | <0.016   | 0.002         | 4             | 0.064        |
| 17             | 0.023       | <0.016   | 16            | 8             | 0.19         |
| 18             | <0.002      | <0.016   | 3             | 8             | 0.19         |
| 19             | 0.002       | <0.016   | 0.002         | 8             | 0.064        |
| 20             | 0.002       | <0.016   | 3             | 12            | 0.125        |
| 21             | 0.003       | <0.016   | 2             | 12            | 0.19         |
| 22             | 0.004       | <0.016   | 2             | 12            | 0.25         |
| 23             | 0.016       | 0.047    | >32           | 6             | 0.5          |
| 24             | 0.003       | <0.016   | 0.003         | 8             | 0.094        |
| 25             | 0.003       | <0.016   | 0.003         | 12            | 0.19         |
| 26             | 0.003       | <0.016   | 0.003         | 8             | 0.19         |
| 27             | 0.006       | <0.016   | 0.002         | 8             | 0.19         |
| 28             | 0.004       | <0.016   | 0.002         | 8             | 0.19         |
| 29             | <0.002      | <0.016   | 0.003         | 8             | 0.094        |
| 30             | <0.002      | <0.016   | 0.003         | 12            | 0.125        |
| 31             | 0.002       | <0.016   | 0.094         | 8             | 0.38         |
| 32             | <0.002      | <0.016   | 0.003         | 6             | 0.19         |
| 33             | <0.002      | <0.016   | 0.003         | 8             | 0.19         |
| 34             | <0.002      | <0.016   | 0.003         | 8             | 0.19         |
| 35             | 0.032       | 0.047    | 6             | 8             | 0.19         |
| 36             | <0.002      | <0.016   | 0.003         | 12            | 0.19         |
| 37             | 0.004       | <0.016   | 0.008         | 12            | 0.19         |
| 38             | 0.047       | 0.047    | 12            | 16            | 0.19         |
| 39             | 0.032       | 0.047    | 8             | 12            | 0.19         |
| 40             | <0.002      | <0.016   | 0.004         | 24            | 0.38         |
| 41             | 0.004       | <0.016   | 0.003         | 8             | 0.19         |
| 42             | <0.002      | <0.016   | 0.002         | 6             | 0.19         |

|    |        |        |        |    |       |
|----|--------|--------|--------|----|-------|
| 43 | 0.002  | <0.016 | 1.5    | 12 | 0.25  |
| 44 | <0.002 | <0.016 | 0.003  | 8  | 0.25  |
| 45 | 0.002  | <0.016 | 0.002  | 8  | 0.25  |
| 46 | 0.004  | <0.016 | 0.006  | 8  | 0.5   |
| 47 | 0.002  | <0.016 | 0.003  | 12 | 0.125 |
| 48 | 0.008  | <0.016 | 0.008  | 12 | 0.5   |
| 49 | <0.002 | <0.016 | 0.003  | 12 | 0.094 |
| 50 | 0.023  | 0.047  | 16     | 12 | 0.25  |
| 51 | 0.006  | <0.016 | 0.003  | 12 | 0.19  |
| 52 | 0.002  | <0.016 | 1.5    | 12 | 0.38  |
| 53 | 0.008  | <0.016 | 0.008  | 12 | 0.75  |
| 54 | 0.016  | 0.016  | 6      | 12 | 0.19  |
| 55 | 0.006  | <0.016 | 0.003  | 12 | 0.19  |
| 56 | 0.006  | <0.016 | 0.003  | 16 | 0.25  |
| 57 | 0.006  | <0.016 | >32    | 12 | 1.5   |
| 58 | 0.002  | <0.016 | 0.003  | 8  | 0.19  |
| 59 | 0.016  | 0.032  | 12     | 12 | 0.38  |
| 60 | 0.002  | <0.016 | <0.002 | 8  | 0.047 |
| 61 | 0.006  | <0.016 | 2      | 16 | 0.25  |
| 62 | 0.003  | <0.016 | 0.003  | 12 | 4     |
| 63 | 0.004  | <0.016 | 0.004  | 12 | 0.38  |
| 64 | 0.003  | <0.016 | 4      | 12 | 0.19  |
| 65 | 0.003  | <0.016 | 0.004  | 8  | 0.125 |
| 66 | 0.004  | <0.016 | 6      | 12 | 1     |
| 67 | 0.003  | <0.016 | 0.004  | 8  | 0.19  |
| 68 | 0.004  | <0.016 | 0.004  | 12 | 0.19  |
| 69 | 0.004  | <0.016 | 0.004  | 16 | 0.38  |
| 70 | 0.002  | <0.016 | 0.004  | 12 | 0.25  |
| 71 | 0.002  | <0.016 | 0.004  | 8  | 0.19  |
| 72 | 0.016  | 0.064  | >32    | 12 | 0.75  |
| 73 | 0.032  | 0.094  | >32    | 16 | 0.75  |
| 74 | 0.023  | 0.094  | >32    | 12 | 0.75  |
| 75 | 0.002  | <0.016 | 3      | 12 | 0.19  |
| 76 | 0.004  | <0.016 | 4      | 12 | 0.19  |
| 77 | 0.002  | <0.016 | 4      | 8  | 0.125 |
| 78 | 0.004  | <0.016 | <0.002 | 8  | 0.047 |
| 79 | 0.032  | 0.047  | >32    | 12 | 0.38  |
| 80 | 0.047  | 0.047  | >32    | 12 | 0.38  |
| 81 | 0.047  | 0.047  | >32    | 12 | 0.38  |
| 82 | 0.032  | 0.064  | >32    | 12 | 0.5   |
| 83 | 0.047  | 0.047  | >32    | 12 | 0.5   |
| 84 | 0.023  | 0.047  | >32    | 12 | 0.5   |
| 85 | 0.002  | <0.016 | 0.004  | 12 | 0.25  |
| 86 | 0.006  | 0.016  | 0.19   | 12 | 0.064 |
| 87 | 0.002  | <0.016 | 0.003  | 12 | 0.38  |
| 88 | 0.003  | <0.016 | 6      | 16 | 0.25  |

|    |       |        |       |    |       |
|----|-------|--------|-------|----|-------|
| 89 | 0.002 | <0.016 | 0.004 | 12 | 0.38  |
| 90 | 0.023 | 0.032  | 12    | 12 | 0.38  |
| 91 | 0.023 | 0.19   | >32   | 12 | 0.094 |
| 92 | 0.012 | 0.032  | 0.006 | 6  | 0.023 |
| 93 | 0.006 | 0.016  | 2     | 8  | 0.19  |

\*There are 93 instead of 94 results because the specimens for 4 P and 4 R were pooled together for culture.



**Table S6.** Prediction of antimicrobial resistance based on the real-time PCR results for samples without paired culture isolates

| Reaction                                           | Associated antibiotic | Genital specimens |             |       | Extra-genital specimens |             |       | All sites combined |             |       |
|----------------------------------------------------|-----------------------|-------------------|-------------|-------|-------------------------|-------------|-------|--------------------|-------------|-------|
|                                                    |                       | resistant         | susceptible | total | resistant               | susceptible | total | resistant          | susceptible | total |
| <i>penA</i> Asp345del +/-<br><i>penA</i> Gly545Ser | ESCs                  | 0                 | 10          | 10    | 25                      | 20          | 45    | 25                 | 30          | 55    |
| 23S rRNA C2611T and/or<br>23S rRNA A2059G          | AZM                   | 0                 | 10          | 10    | 7                       | 38          | 45    | 7                  | 48          | 55    |
| <i>gyrA</i> Ser91Phe                               | CIP                   | 2                 | 8           | 10    | 18                      | 27          | 45    | 20                 | 35          | 55    |
| 16S rRNA C1192T                                    | SPC                   | 0                 | 10          | 10    | 2                       | 43          | 45    | 2                  | 53          | 55    |

**Note.** ESCs, extended-spectrum cephalosporins; AZM, azithromycin; CIP, ciprofloxacin; SPC, spectinomycin

**Table S7.** Clinical samples per sampling site with and without paired isolates

| <b>Sample site</b> | <b>Samples with paired isolates (95% CI)</b> | <b>Samples without paired isolates (95% CI)</b> |
|--------------------|----------------------------------------------|-------------------------------------------------|
| pharynx            | 23 (0.10, 0.36)                              | 30 (0.40, 0.68)                                 |
| rectum             | 31 (0.20, 0.45)                              | 15 (0.10, 0.41)                                 |
| urethra            | 35 (0.30, 0.49)                              | 8 (0.00, 0.28)                                  |
| vagina             | 2 (0.00, 0.14)                               | 1 (0.00, 0.15)                                  |
| cervix             | 3 (0.00, 0.15)                               | 1 (0.00, 0.15)                                  |

**Note.** CI, multinomial confidence interval of the proportion
