# Supplementary material for: Mismatch Amplification Mutation Assay-Based Real-Time PCR for Rapid Detection of Neisseria gonorrhoeae and Antimicrobial Resistance Determinants in Clinical Specimens
Source: PubMed Central journal article supplement (PMC6113480; doi:10.1128/jcm.00365-18), 2018-08-27
Supplement: zjm999096088s2.pdf [file zjm999096088s2.pdf]

A

## Mutated 23S rRNA A2059G

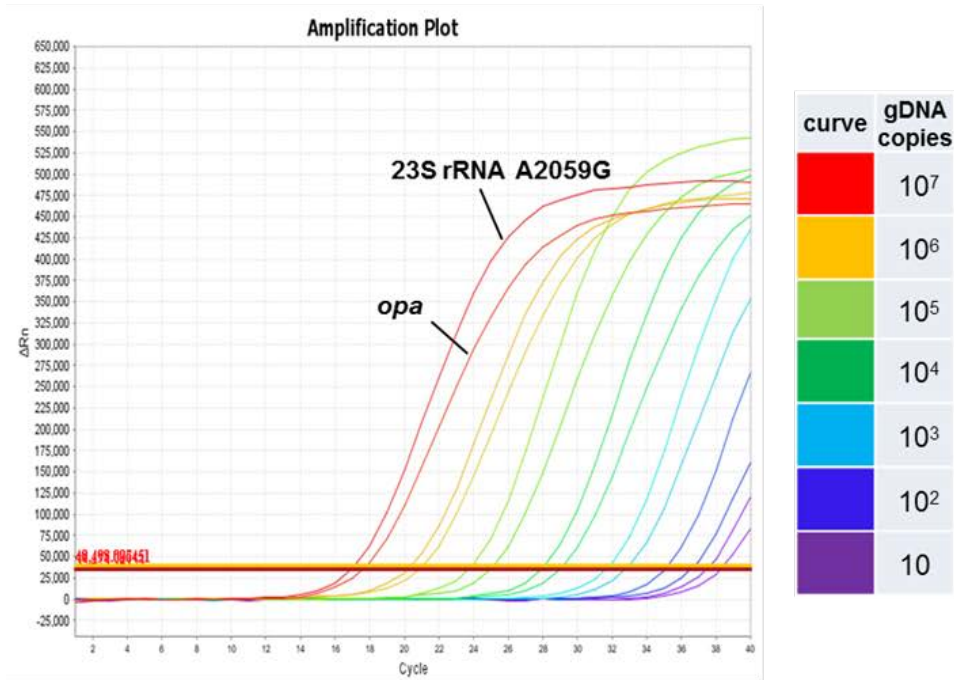

B

## Wt 23S rRNA A2059

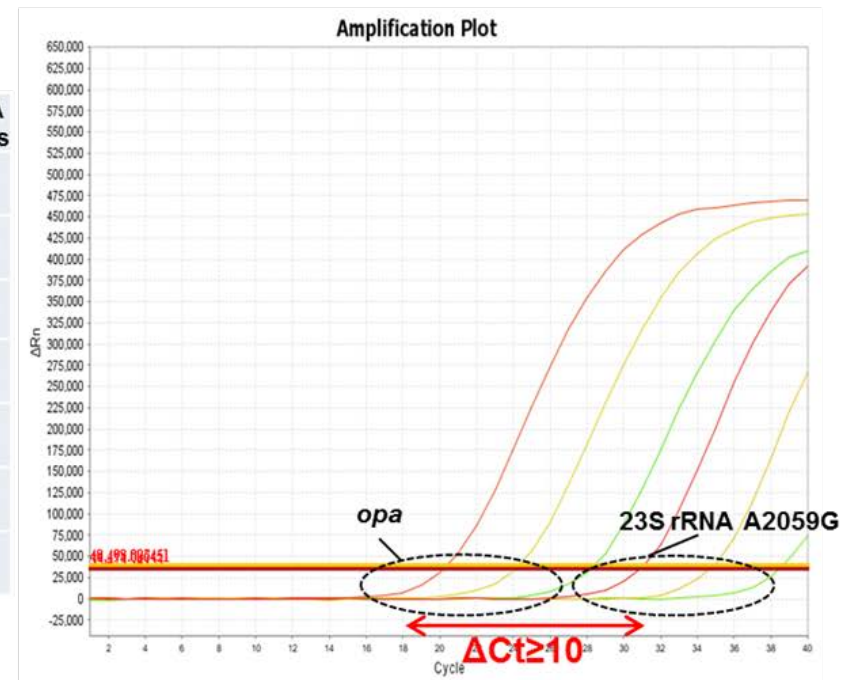

**Figure S1. Example of delayed amplification due to the MAMA-strategy.** When plating same amounts of gDNA copies/reaction, the Ct of the *opa* reaction will be comparable to the the Ct of the AMR reaction if the mutated allele is present (A), whereas there will be a strong delay in the amplification if the wild type allele is present (B). The different colors indicate different amounts of plated gDNA.

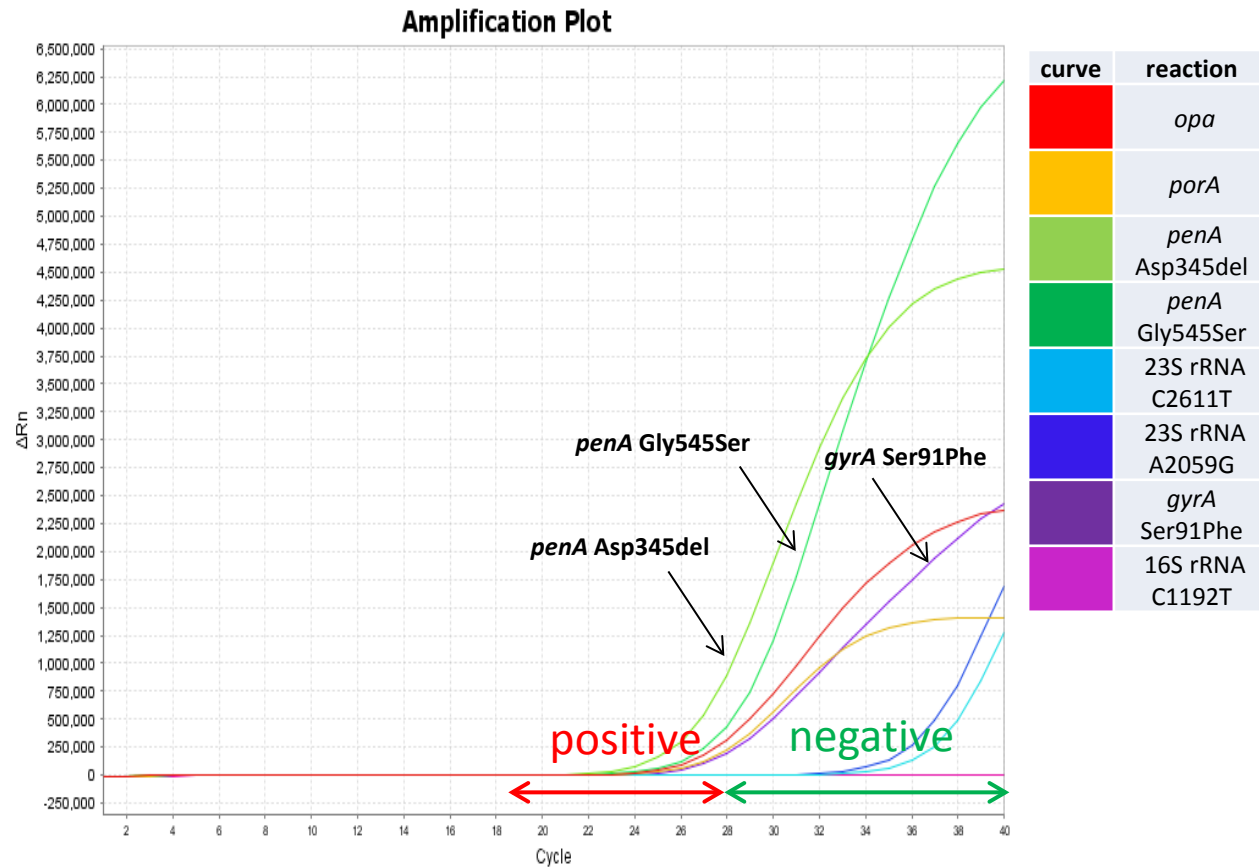

**Figure S2. Example of a sample positive for NG.** Different reactions are highlighted with different colors. Based on the  $\Delta C_t$  established for the AMR reactions, this sample was positive for the both *penA* reactions, indicating the presence of a mosaic XXXIV *penA* allele, as well as for the *gyrA* Ser91Phe reaction. All other AMR reactions were negative.

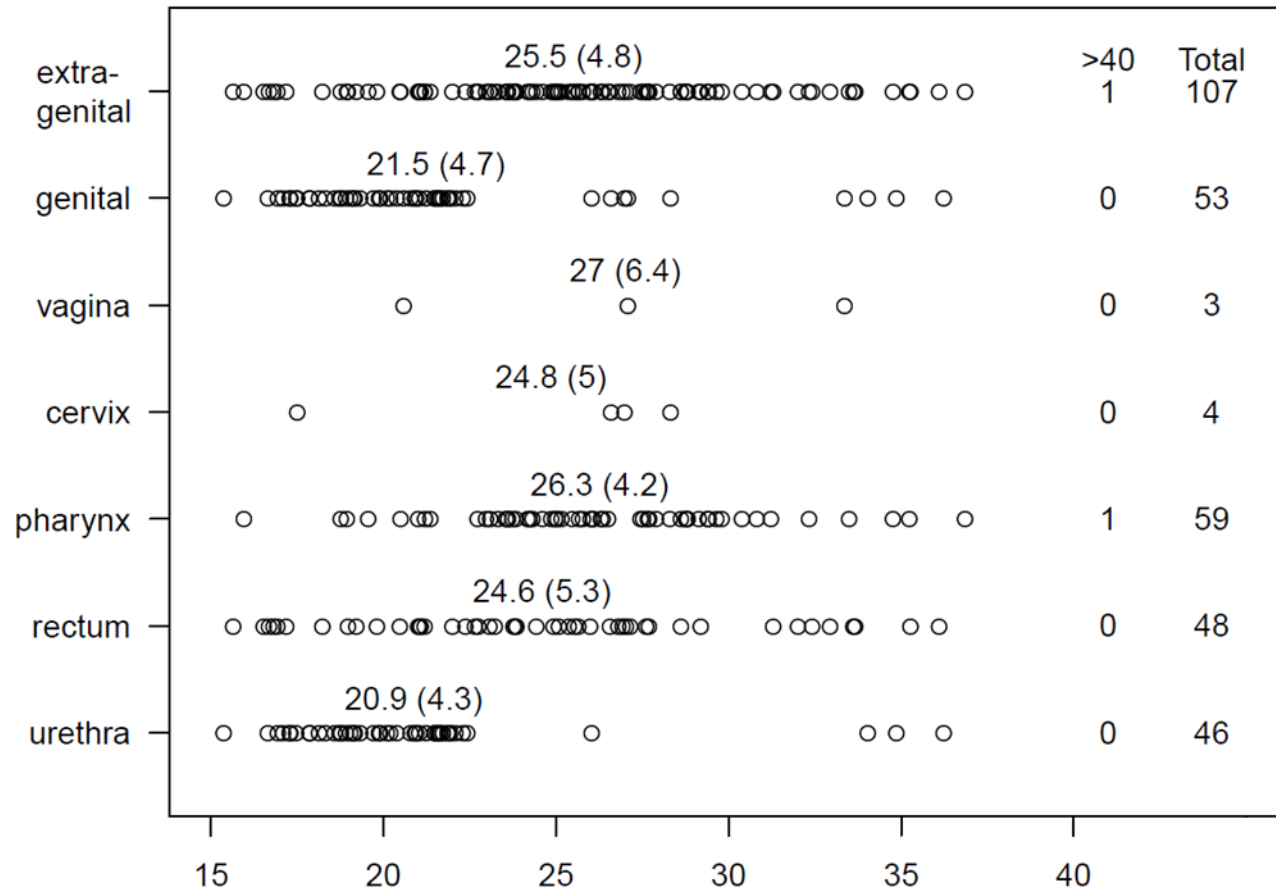

**Figure S3. Distribution of the cycle threshold values of the *opa* reaction obtained for each sample type positive for NG by commercial NAAT.** Each dot represents one sample. The mean value for each sample type is shown on top with the brackets denoting the standard deviation.
